# Supplementary material for: TheNitrosopumilus maritimusCdvB, but Not FtsZ, Assembles into Polymers
Source: Hindawi journal article supplement (doi:10.1155/2013/104147), 2013-01-01
Supplement: f1 [file 104147.f1.zip]

# Table S1

| Primer  | Sequence                                             | Gene/Construct                 |
|---------|------------------------------------------------------|--------------------------------|
| MOH4953 | CTGACTTATAGTCGCTTTGTAAATCATATGGCTAATCTTCTAACAAATGG   | Nmar_0029                      |
| MOH4954 | AGCGTTGTTGTTGTTCCCGGGATCCCCATAAACTTTGATGTAGATTC      | Nmar_0029                      |
| MOH4955 | CTGACTTATAGTCGCTTTGTAAATCATATGCCTAATTTTGATAAACTTGG   | Nmar_0061                      |
| MOH4956 | AGCGTTGTTGTTGTTCCCGGGATCCCCTTCAAATGTTGAAGTAGATGT     | Nmar_0061                      |
| MOH4957 | CTGACTTATAGTCGCTTTGTAAATCATATGTTATCTAATTCATGGAATAAC  | Nmar_0816                      |
| MOH4958 | AGCGTTGTTGTTGTTCCCGGGATCCCCGATAAAAAATATCAGTTTTCTT    | Nmar_0816                      |
| MOH5004 | CTGACTTATAGTCGCTTTGTAAATCATATGTCTATGGCACCTCAAGAATTG  | Nmar_1088                      |
| MOH5005 | AGCGTTGTTGTTGTTCCCGGGATCCCCAAGAGCTTGAAATTCCTTCAGAC   | Nmar_1088                      |
| MOH4951 | CTGACTTATAGTCGCTTTGTAAATCATATGTCTTTTCAAGTTAAAGAACCT  | Nmar_1262                      |
| MOH4952 | AGCGTTGTTGTTGTTCCCGGGATCCCCTTCTAATTGGTAAAGATCAAG     | Nmar_1262                      |
| MOH5101 | GGTGGAGGTACTGGAAGTGGTATGGCACCTGTGTTTCAGAAATG         | Nmar_1262**                    |
| MOH5102 | ACCAGTTCCAGTACCTCCACCAAGATTAGACATCATAACAATAG         | Nmar_1262**                    |
| MOH5155 | CTGACTTATAGTCGCTTTGTAAATCATATGACTGTTTCTGAATTGGGAGATG | Nmar_0816 <sub>(109-216)</sub> |
| MOH5156 | AGCGTTGTTGTTGTTCCCGGGATCCCCATCAAGTCTTAACTTAACCTGTTC  | Nmar_0816 <sub>(1-108)</sub>   |
| MOH5294 | AGCGTTGTTGTTGTTCCCGGGATCCCCAGTTTGTCTGCAATAACACCTTG   | Nmar_0816 <sub>(1-192)</sub>   |
| MOH4981 | GTTGTTGTTACACTTCTCCTGCTATGTCAATTATTAAGGGTCTTG        | Nmar_0816 <sub>C123A</sub>     |
| MOH4982 | CAAGACCCTTAATAATTGACATAGCAGGAGAAAGTGAACAACAAC        | Nmar_0816 <sub>C123A</sub>     |
| MOH4964 | CCCCCGAATTCATGTTATCTAATTCATGGAAT                     | Nmar_0816 in pEGFP             |
| MOH4963 | CCCCCCCCCGGGTTAGATAAAAAATATCAGTTTTTC                 | Nmar_0816 in pEGFP             |
| MOH4962 | CCCCCGGATCCATGTTATCTAATTCATGGAAT                     | Nmar_0816 in pQE30             |
| MOH4963 | CCCCCCCCCGGGTTAGATAAAAAATATCAGTTTTTC                 | Nmar_0816 in pQE30             |

**Table S1: List of primers used in this study.**

# Table S2

| Strain | Genotype                                                                                                         | Source         |
|--------|------------------------------------------------------------------------------------------------------------------|----------------|
| 1      | <i>ura4</i> -D18 <i>leu1</i> -32 h- (MBY192)                                                                     | Lab collection |
| 2      | <i>nmt42</i> -GFP:: <i>ura4</i> <sup>+</sup> <i>ura4</i> -D18 <i>leu1</i> -32 h- (MBY3495)                       | Lab collection |
| 3      | <i>nmt42</i> -Nmar_0029-GFP:: <i>ura4</i> <sup>+</sup> <i>ura4</i> -D18 <i>leu1</i> -32 h-                       | This study     |
| 4      | <i>nmt42</i> -Nmar_0061-GFP:: <i>ura4</i> <sup>+</sup> <i>ura4</i> -D18 <i>leu1</i> -32 h-                       | This study     |
| 5      | <i>nmt42</i> -Nmar_0816-GFP:: <i>ura4</i> <sup>+</sup> <i>ura4</i> -D18 <i>leu1</i> -32 h-                       | This study     |
| 6      | <i>nmt42</i> -Nmar_1088-GFP:: <i>ura4</i> <sup>+</sup> <i>ura4</i> -D18 <i>leu1</i> -32 h-                       | This study     |
| 7      | <i>nmt42</i> -Nmar_0816-GFP:: <i>ura4</i> <sup>+</sup> <i>ura4</i> -D18 <i>leu1</i> -32 h- (RE)                  | This study     |
| 8      | <i>nmt42</i> -Nmar_0816 <sub>(1-108)</sub> -GFP:: <i>ura4</i> <sup>+</sup> <i>ura4</i> -D18 <i>leu1</i> -32 h-   | This study     |
| 9      | <i>nmt42</i> -Nmar_0816 <sub>(109-216)</sub> -GFP:: <i>ura4</i> <sup>+</sup> <i>ura4</i> -D18 <i>leu1</i> -32 h- | This study     |
| 10     | <i>nmt42</i> -Nmar_0816 <sub>(1-192)</sub> -GFP:: <i>ura4</i> <sup>+</sup> <i>ura4</i> -D18 <i>leu1</i> -32 h-   | This study     |
| 11     | <i>nmt42</i> -Nmar_0816 <sub>C123A</sub> -GFP:: <i>ura4</i> <sup>+</sup> <i>ura4</i> -D18 <i>leu1</i> -32 h-     | This study     |
| 12     | <i>nmt42</i> -Nmar_1262-GFP:: <i>ura4</i> <sup>+</sup> <i>ura4</i> -D18 <i>leu1</i> -32 h-                       | This study     |
| 13     | <i>nmt42</i> -Nmar_1262** <sub>-</sub> -GFP:: <i>ura4</i> <sup>+</sup> <i>ura4</i> -D18 <i>leu1</i> -32 h-       | This study     |
| 14     | <i>nmt42</i> -EcFtsZ-GFP:: <i>ura4</i> <sup>+</sup> <i>ura4</i> -D18 <i>leu1</i> -32 h- (MBY3497)                | Lab collection |
| 15     | <i>nmt42</i> -EcFtsZD209A-GFP:: <i>ura4</i> <sup>+</sup> <i>ura4</i> -D18 <i>leu1</i> -32 h- (MBY4742)           | Lab collection |

RE: Yeast strain constructed using plasmid cloned by restriction-based method.

MBY: Lab strains.

**Table S2: List of yeast strains used in this study.**
