# Supplementary material for: TheNitrosopumilus maritimusCdvB, but Not FtsZ, Assembles into Polymers
Source: Hindawi journal article supplement (doi:10.1155/2013/104147), 2013-01-01
Supplement: f1 [file 104147.f1.zip]

# Figure S1

|           |                                                                               |     |
|-----------|-------------------------------------------------------------------------------|-----|
| Saci_1416 | MADVNDFLRNWGRQEPTISEKIKNLFKSQQPLRYRLVMANYRLRTTISRLDVYISKLQE                   | 60  |
| Saci_0451 | MTAIYILTMISKEFQKIWEGNQKVKIPKSKDPLKYRLVQAQYRVRSMLDVYIGRMQE                     | 60  |
| Nmar_0061 | ---MPNFDKTWARQETQSVTGKLEAVKPKGALKPRIQTAVNKLQVQISKMDSMLGKLHE                   | 57  |
| Nmar_0029 | ---MANLSNKWTKPPTTSITEKIGDTVKPKGALKPRVQEGVKRLRLQIQKLDKMLSGLKE                  | 57  |
| Nmar_0816 | -----MLSNSWNNTGGESISQKVMGKVKPDEPLKNKIDFAQKKLQFQITKLEGINEKLRV                  | 55  |
| Saci_1373 | -----MFDKLSIIFNSDR-----KRKVHLSKAITEISLKLKEQQDRLEAIRRLRE                       | 46  |
| Saci_1601 | -----MKKRTIAELLTDIRMAKYKIDMWISKAEN                                            | 29  |
|           | : : :                                                                         |     |
| Saci_1416 | RDRSLFEKVVESQISKDSARAAMYANEIAEIRKITKQLLTTEIALEQVQLRLETITEIGD                  | 120 |
| Saci_0451 | RDKVLFERVVESQMSKDQSRAAMYANELAEIRKITKQLLTQIALEQVSLRLETVTTELGD                  | 120 |
| Nmar_0061 | RDAQLFQRVVTAMQQHDTSTSRVLSNELAEIRKVTKMLGNARMSLEQVQLRLTTIHDLDG                  | 117 |
| Nmar_0029 | RDEQLFARIVEATQKHDTQTSKVLGNELAEIRKVIKIMSSARVALEQIELRLTTFSDLGD                  | 117 |
| Nmar_0816 | KHDQIFEKIVSAHKSNNKAYAQAYANELAQVRKMKNMMSGAKLSMEQVKLRDLTVSELGD                  | 115 |
| Saci_1373 | RDKDLFEKVIRSQIEGDIARATIYAQEISDIRKMIKIIYTAYLAIEKVRLKLDTVQELQG                  | 106 |
| Saci_1601 | RNK-ALERLSLSNIGRFPLLSKEYIKETELTRKYIVTLVQLKILLEILEIRLETIILGN                   | 88  |
|           | :. : : : : * * : : * : : * . : .                                              |     |
| Saci_1416 | IFTSLVPVIGVIRELRNVMKGVMPELSIELADLEEGLQEVVLEA-GEFTGARVDFATSSP                  | 179 |
| Saci_0451 | IFANLIPVMGVINELKTSKGVMPELSIELGELGEGLQEIIVIEA-GEFSGVSGISATYSP                  | 179 |
| Nmar_0061 | AMVAIGPAMSTMKGLKSSLGRFMPEADSELNTMTQTLNGLMMDS-LAGDSFNMESDVSSE                  | 176 |
| Nmar_0029 | TVVAIMPTMGLMKNLKSSLGKVMPGAEEAIGQMAEMLGGFMTE-FSGDAAFGMDETTNA                   | 176 |
| Nmar_0816 | VVVTLSPLMSIIKGLAPSLNGIMPEANASMQDLSSVLGDVMSSVDLDGDSMSGVPETNA                   | 175 |
| Saci_1373 | VSLVLPVPMRILGELKEQVRGIAPEVALALDSITSSVNSIAIET-GALSEKTFVPTVADE                  | 165 |
| Saci_1601 | VVTYLSPLVEALNELKGQLG-ASIEFSPIIDEIITETIRTVYIAP---NTVQQSPQINVKE                 | 144 |
|           | : * : : * : : : . : .                                                         |     |
| Saci_1416 | EARKILDEASAVAEQRMKEKFPSLPSFATSVDQKTNANQK-----                                 | 219 |
| Saci_0451 | EARQILEEASVVAEQRMKEKFPSLPAAGITQQQS-----                                       | 214 |
| Nmar_0061 | ETEKILQEASAVAEQQIGDKFPSVPSSSTGLSSGTSTSTFE-----                                | 216 |
| Nmar_0029 | ESDAILKEAAVAESSAGQMFPSVPTESAAST-ESTSKFY-----                                  | 215 |
| Nmar_0816 | DTLAILEEAQGVIAQT <b>KASIPDVPDSL</b> KQQIVEKKTDIFI-----                        | 216 |
| Saci_1373 | QAKQIMEEAQKMAEVKV <b>RELLPELPHPP</b> SELPKRVAKQVQSSNKK <b>LS</b> EDMILNYIKTTG | 225 |
| Saci_1601 | EARQLLKEAEDVAKKELKENYKIEI-----                                                | 169 |
|           | :: :. ** :                                                                    |     |
| Saci_1416 | -----                                                                         |     |
| Saci_0451 | -----                                                                         |     |
| Nmar_0061 | -----                                                                         |     |
| Nmar_0029 | -----                                                                         |     |
| Nmar_0816 | -----                                                                         |     |
| Saci_1373 | <b>GFIDVDYIAKNFDVSKDEVFNVLRRLEEKGLIVLEG</b>                                   | 261 |
| Saci_1601 | -----                                                                         |     |

**Figure S1: Multiple sequence alignment of the CdvB genes from *N. maritimus* and *S. acidocaldarius*.**

Highly conserved and partially conserved residues are highlighted as asterisks and dots, respectively. CdvA binding site and MIM2 motif in Saci\_1373 [7] are highlighted in red and purple, respectively. Putative MIM2 motif in Nmar\_0816 is highlighted in blue (Figure S5). Cysteine residue in Nmar\_0816 is highlighted in green. The multiple sequence alignment was performed using ClustalW2 program.

## Figure S2

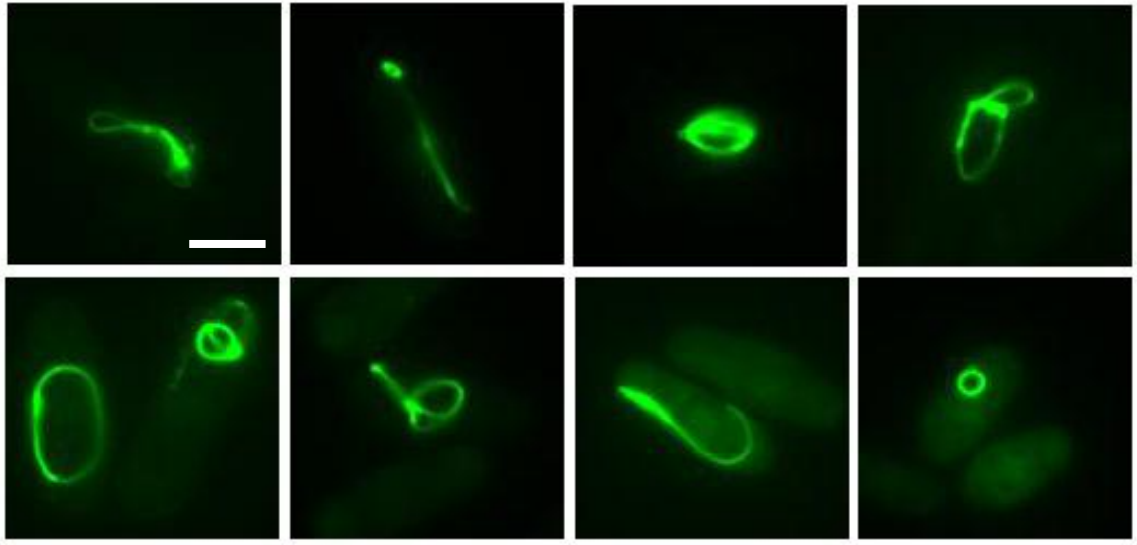

**Figure S2: Nmar\_0816 forms diverse polymeric structures in yeast**

Images of yeast cells expressing Nmar\_0816-GFP. Scale bar: 5  $\mu\text{m}$ .

# Figure S3

## A

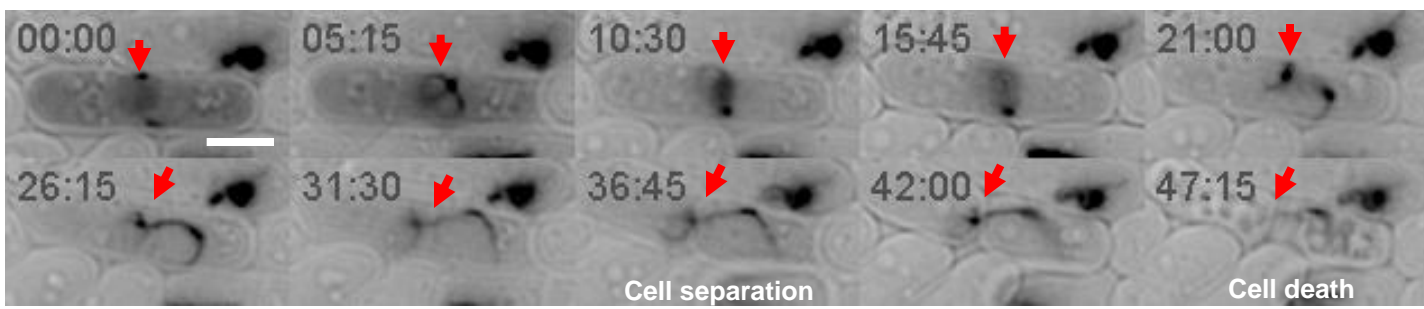

## B

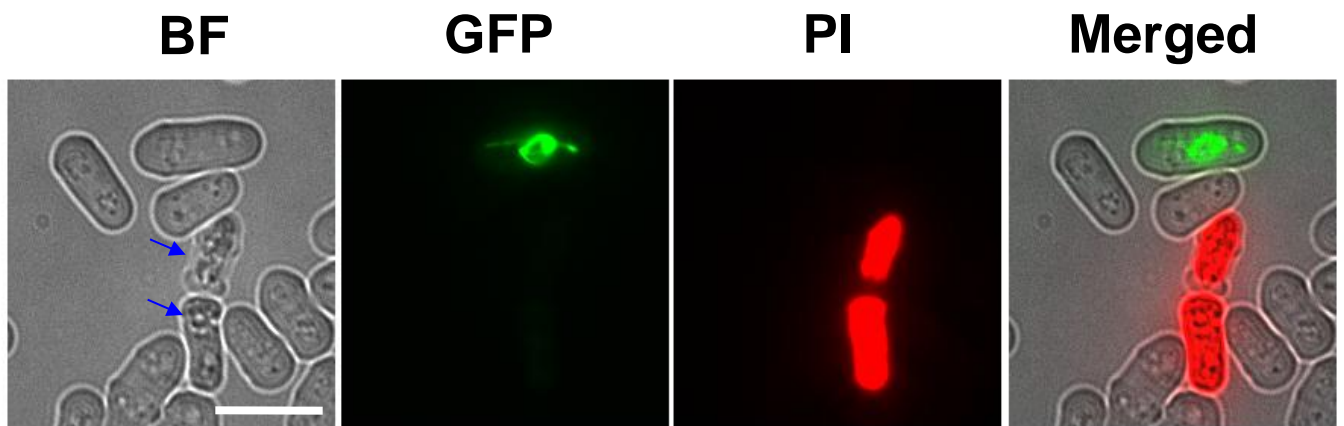

**Figure S3: Failure to dissolve Nmar\_0816 polymers during yeast cell division causes cell death.**

(A) Time-lapse images of yeast cells expressing Nmar\_0816-GFP polymers during cell division. Red arrows indicate mid-cell regions. Extensive cytosolic vacuolization of cells at the end of the cell division indicates cell death. Video S2. Scale bar: 5  $\mu\text{m}$ . (B) Images of yeast cells expressing Nmar\_0816-GFP and stained with 10  $\mu\text{g/mL}$  propidium iodide to reveal cell death. Blue arrows point to extensively vacuolated cells. BF: bright field; GFP: Nmar\_0816-GFP; PI: propidium iodide staining. Scale bar: 10  $\mu\text{m}$ .

## Figure S4

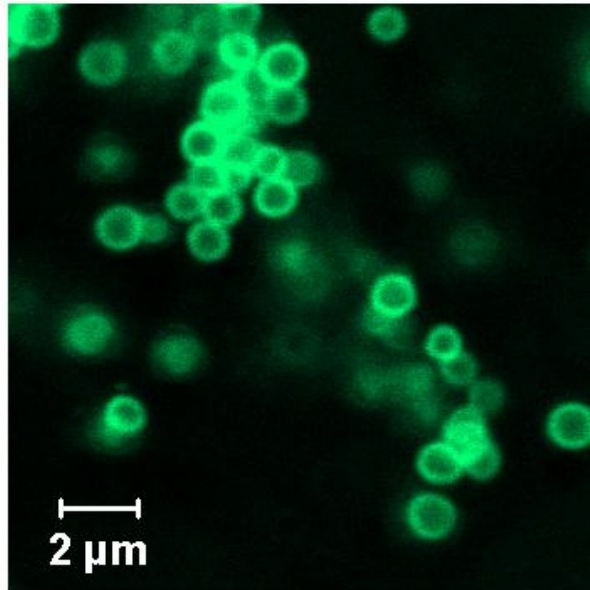

**Figure S4: Nmar\_0816 localizes to the rim of endosomes in NRK cells.**

Image of NRK cells expressing GFP-Nmar\_0816.

# Figure S5

|           |                                                                |     |
|-----------|----------------------------------------------------------------|-----|
| hvps20    | ---MGNLFGRKKQSRVTEQDKAILQLKQQRDKLRQYQKRIAQQQLERERALARQLLRDGRK  | 57  |
| SpVps20   | ---MG-----VNSSKINDKDRSILSIKEQRDKLLRYSKRLEKIEQLEIDIARKCLRDSDK   | 52  |
| hSnf7-1   | MSGLGRLFGKGKKEKGPTPEEAIQKLKETEKILIKKQEFLQKIQQELQTAKKYGTK-NK    | 59  |
| SpSnf7    | MSGFLRWFG-GNRSKD-TTKDTIVRFQEMLALYDKKEEVLERQIAEQTEIARKNATT-NK   | 57  |
| Nmar_0061 | -----MPNFDKTWARQETQSVTGKLR EAVKPPQGALKPRIQTAVNKLQVQISKMDS      | 50  |
| Nmar_0029 | -----MANLSNKWTKPPTTSITEKIGDTVKPKGALKPRVQEGVKRLRLQIQKLDK        | 50  |
| Nmar_0816 | -----MLSNSWNNTGGESISQKVMGKVKPDEPLKNKIDFAQKKLQFQITKLEG          | 48  |
| hvps24    | ---MGLFGKTQEKPPKELVNEWSLKIRKEMRVVDRQIRDIQREEEKVKRSVKDAAKKGQK   | 57  |
| SpVps24   | --MQTVRSYFFGPTPQEQRNKWQSIIRKEQRQLDRQVYHLKAGRKKADEVQLKLAKQSDI   | 58  |
|           | . : :                                                          |     |
| hvps20    | ERAKLLLLKKKRYQEQLLDRTENQISSLEAMVQSIEFTQIEMKVM EGLQFGNECLNMH QV | 117 |
| SpVps20   | RGALRALKAKKLYSGLITQTYGQLGNIEQLLSTIEFTLIQKDV MFGLQEGTNLIRQLQAD  | 112 |
| hSnf7-1   | RAALQALRRKKRFEQQLAQTDGTLSTLEFQREAIENATTNAEVLRTMELAAQSMKKAYQD   | 119 |
| SpSnf7    | RLALTALKRKKMHENELVKIEGSRNNIEQQLFSIQANLN FETLQAMRQGAEAMKSIQRG   | 117 |
| Nmar_0061 | MLGKLHERDAQLFQRVVTAMQQH-DTSTSRVLSNELAEIRKVTKMLGNARMSLEQVQLRL   | 109 |
| Nmar_0029 | MLSGLKERDEQLFARIVEATQKH-DTQTSKVLGNELAEIRKVIKIMSSARVALEQIELRL   | 109 |
| Nmar_0816 | INEKLRVKHDQIFEKIVSAHKS-NKAYAQAYANELAQVRKMKNMVSGAKLSMEQVKLRL    | 107 |
| hvps24    | DVCIVLAKEMIRSRKAVSKLYASKAHMNSVLMGMKNQLAVLRVAGSLQKSTEVMKAMQSL   | 117 |
| SpVps24   | TNMRILAKEIARANRHGKRLAESKALLGSLSLQLNDQMAM LKIQGTMQSSTKIMQDVSSL  | 118 |
|           | : :                                                            |     |
| hvps20    | MSIEEVERILDETQEAVEYQRQIDELLAGSFTQ---EDED AILEELSAITQE Q-----   | 167 |
| SpVps20   | MPLERVGRICNDRDEAMS YVDEVNDMLQGRMSR---DQEDEIQEELDSLIREQEDEKVKD  | 169 |
| hSnf7-1   | MDIDKVDELMTDITEQQEVAQQISDAISRPMGFGDDVDEDELLEEELEEQEE-----      | 172 |
| SpSnf7    | MDADKVDQIMDKIRDQQTISEEISTMISTPVG LNAEIDEDELANELDELQQME-----    | 170 |
| Nmar_0061 | TTIHDLGDAMVAIGPAMSTMKGLKSSLGRFMPEAD-SELNTMTQT LNLGMMS-----     | 161 |
| Nmar_0029 | TTFSDLGDTVVAIMPTMGLMKNLKLSSLGKVMPGA E-AEIGQMAEMLGGFMTE-----    | 161 |
| Nmar_0816 | DTVSELGDVVVTLSPCMSIIKGLAPSLNGIMPEAN-ASMQD LSSVLGDVMSGSS-----   | 160 |
| hvps24    | VKIPEIQATMREL SKEMMKAGIIEEMLEDTFESMD--DQEEMEEEAEMEIDR-----     | 167 |
| SpVps24   | IRLPQLSETMRNLSMELTKAGVLEEMRDEMFLPVE--DDEELMDL ADEDEEVQEILT KYN | 176 |
|           | : : . : .                                                      |     |
| hvps20    | IELP-----EVPSEPLPEKIP---ENVPVKARPRQAE LVAAS-----               | 201 |
| SpVps20   | LEKPGFTPSTGVDVLP SVPLKNAIPSLDESFPKAASVSNTSSAVVIDEELRKDPVLG     | 226 |
| hSnf7-1   | --LAQELLNVGDKEE EPSVKLPSPS--THLPAGPAP-KVDEDEEALKQLAEWS--       | 222 |
| SpSnf7    | --LDSKMLGA-EKPPVHTPAVPAVPSQVKDLPSISK PQELDEEEELRKLQAEFSL--     | 222 |
| Nmar_0061 | LAGDSFNMESDVSSEETEKILQEASAVAEQQIGDKFPSVPSSTGLSSGTSTSTFE--      | 216 |
| Nmar_0029 | FSGDAAFGMDETTNAESDAILKEAAVAESSAGQMFP SVPTESAAST-ESTSKFY--      | 215 |
| Nmar_0816 | VDLGDSMSVGPETNADTLAILEEAQGVIA GQTKASIPDVPDSLKQQIVEKKTDFI-      | 216 |
| hvps24    | ILFEITAGALGKAPSKVTDALPEPEPPGAMAASEDEEEEEEEALEAMQSRLATLRS--     | 222 |
| SpVps24   | VIPAPSEKAADAATHREOSLKOALPSLNGIAKDS TEIDEEQLLDIRDKLDALKS--      | 231 |

**Figure S5: Multiple sequence alignment of the CdvB genes from *N. maritimus* and ESCRT-III genes from human and fission yeast.**

Partially conserved residues are highlighted as dots. hSnf7-1, hVps24, and hVps20 shown here also known as CHMP4a, CHMP3, and CHMP6, respectively. The myristoylation site in Vps20 [8] is highlighted in red. The MIM2 motif in CHMP6 [6] is highlighted in green. The putative MIM2 of Nmar\_0816 is highlighted in blue. The multiple sequence alignment was performed using ClustalW2 program.



## Figure S6

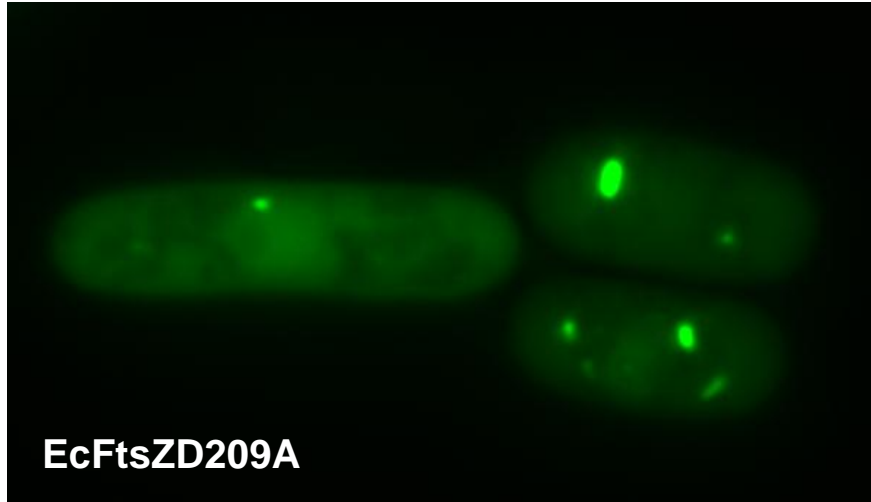

**Figure S6: Expression of *E. coli* FtsZ mutant (D209A) in yeast.**

Image of yeast cells expressing *E. coli* FtsZ-GFP carrying a mutation at T7 loop (EcFtsZD209A).
