# Supplementary material for: The Nitrosopumilus maritimus CdvB, but Not FtsZ, Assembles into Polymers
Source: Archaea. 2013 Jun 2;2013:104147. doi: 10.1155/2013/104147 (PMC3684127; doi:10.1155/2013/104147)
Supplement: Supplementary file 1 — The Supplemental information includes 2 videos (formation of Nmar_0816-GFP filaments in yeast (Video S1); yeast cell death caused by failure to dissolve Nmar_0816 polymers during cell division (Video S2)), 6 figures (multiple sequence alignment of the CdvB genes from N. maritimus and S. acidocaldarius (Figure S1); diverse polymeric structures formed by Nmar_0816 in yeast (Figure S2); yeast cell death caused by failure to dissolve Nmar_0816 polymers (Figure S3); localization of Nmar_0816 to the rim of endosomes in NRK cells (Figure S4); multiple sequence alignment of the CdvB genes from N. maritimus and ESCRT-III genes from human and fission yeast (Figure S5); expression of E. coli FtsZ mutant (D209A) in yeast (Figure S6)), and 2 tables (list of primers used in this study (Table S1); list of yeast strains used in this study (Table S2)). [file 104147.f1.zip]

Archive with 4 entries (4 files):
- Supplementary figures.pdf
- Supplementary tables.pdf
- Video S1.avi
- Video S2.avi
